# Supplementary material for: Structural determinants of dynamic fluctuations between segregation and integration on the human connectome
Source: PubMed Central journal article supplement (PMC7584581; doi:10.1038/s42003-020-01331-3), 2020-10-23
Supplement: 42003_2020_1331_MOESM1_ESM.pdf [file 42003_2020_1331_MOESM1_ESM.pdf]

## Supplementary Information for

# Structural determinants of dynamic fluctuations between segregation and integration on the human connectome

Makoto Fukushima\*, Olaf Sporns

\*Corresponding author at Division of Information Science, Graduate School of Science and Technology, Nara Institute of Science and Technology, 8916-5 Takayama-cho, Ikoma, Nara, 630-0192, Japan

Email address: mfukushi@is.naist.jp

## Supplementary Figures

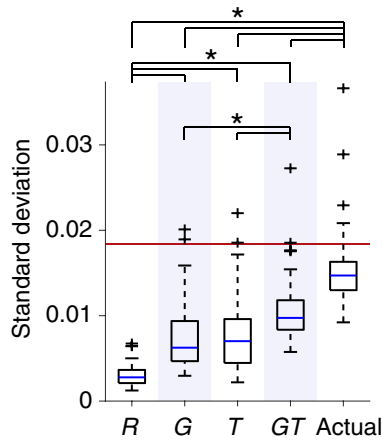

**Supplementary Fig. 1** The SD of dynamic fluctuations in mean TPC. The median SD computed from empirical rs-fMRI data is shown by a red vertical line. An asterisk indicates significant differences between the SDs ( $p < 0.05$ , FDR corrected across all the 10 comparisons). The exact  $p$  and  $n$  are shown in Supplementary Table 2.

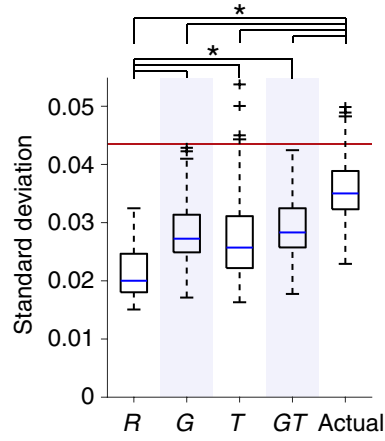

**Supplementary Fig. 2** The SD of dynamic fluctuations in modularity. The median SD computed from empirical rs-fMRI data is shown by a red vertical line. An asterisk indicates significant differences between the SDs ( $p < 0.05$ , FDR corrected across all the 10 comparisons). The exact  $p$  and  $n$  are shown in Supplementary Table 3.

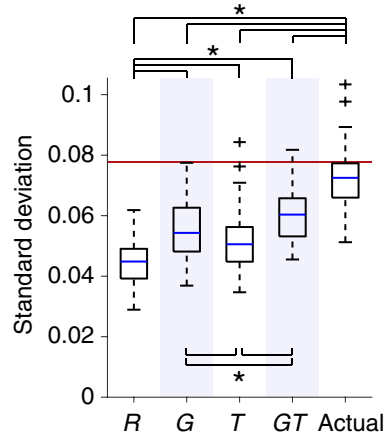

**Supplementary Fig. 3** The SD of dynamic fluctuations in mean PC with a window width of 44 TRs. The median SD computed from empirical rs-fMRI data is shown by a red vertical line. An asterisk indicates significant differences between the SDs ( $p < 0.05$ , FDR corrected across all the 10 comparisons). The exact  $p$  and  $n$  are shown in Supplementary Table 4.

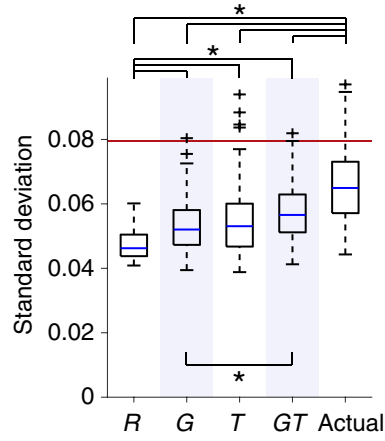

**Supplementary Fig. 4** The SD of dynamic fluctuations in mean PC with a window width of 88 TRs. The median SD computed from empirical rs-fMRI data is shown by a red vertical line. An asterisk indicates significant differences between the SDs ( $p < 0.05$ , FDR corrected across all the 10 comparisons). The exact  $p$  and  $n$  are shown in Supplementary Table 5.

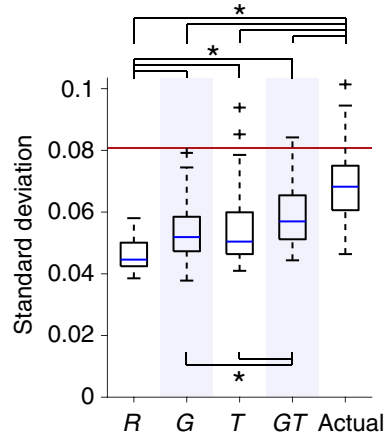

**Supplementary Fig. 5** The SD of dynamic fluctuations in mean PC with a window displacement of 1 TR. The median SD computed from empirical rs-fMRI data is shown by a red vertical line. An asterisk indicates significant differences between the SDs ( $p < 0.05$ , FDR corrected across all the 10 comparisons). The exact  $p$  and  $n$  are shown in Supplementary Table 6.

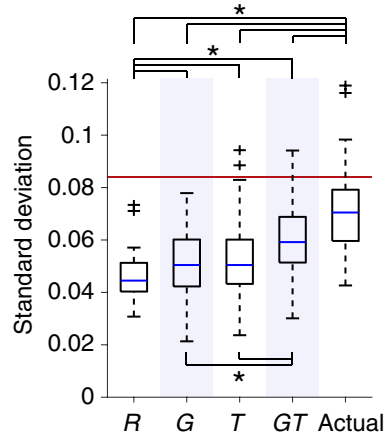

**Supplementary Fig. 6** The SD of dynamic fluctuations in mean PC with a window displacement of 66 TRs. The median SD computed from empirical rs-fMRI data is shown by a red vertical line. An asterisk indicates significant differences between the SDs ( $p < 0.05$ , FDR corrected across all the 10 comparisons). The exact  $p$  and  $n$  are shown in Supplementary Table 7.

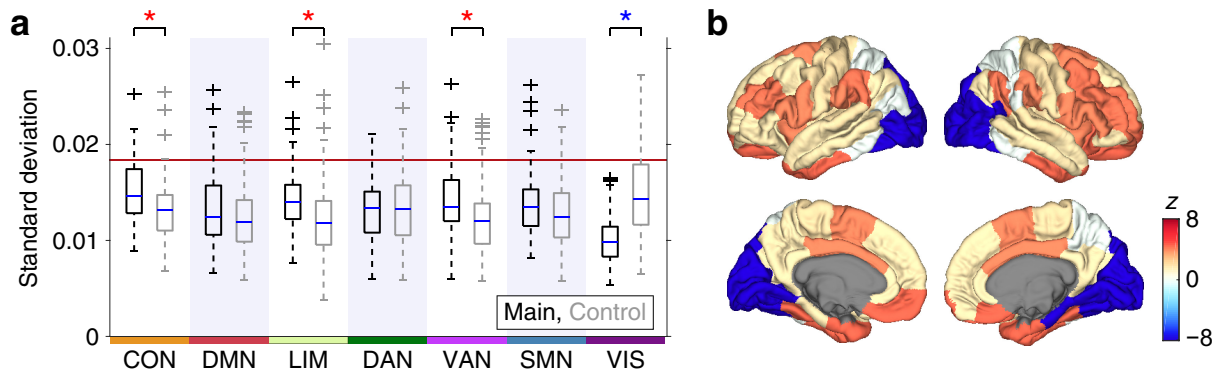

**Supplementary Fig. 7** The SD of dynamic fluctuations in mean TPC, obtained from each main–control pair of the RSN-constrained surrogate connectome data. **a** The SD of mean TPC across time. The median SD computed from empirical rs-fMRI data is shown by a red vertical line. An asterisk indicates significant differences between the SDs ( $p < 0.05$ , FDR corrected across all the 7 comparisons; blue asterisk, Main < Control; red asterisk, Main > Control). The exact  $p$  and  $n$  are shown in Supplementary Table 9. **b** Cortical surface plots of the  $z$ -values of differences between the SDs (Main – Control).

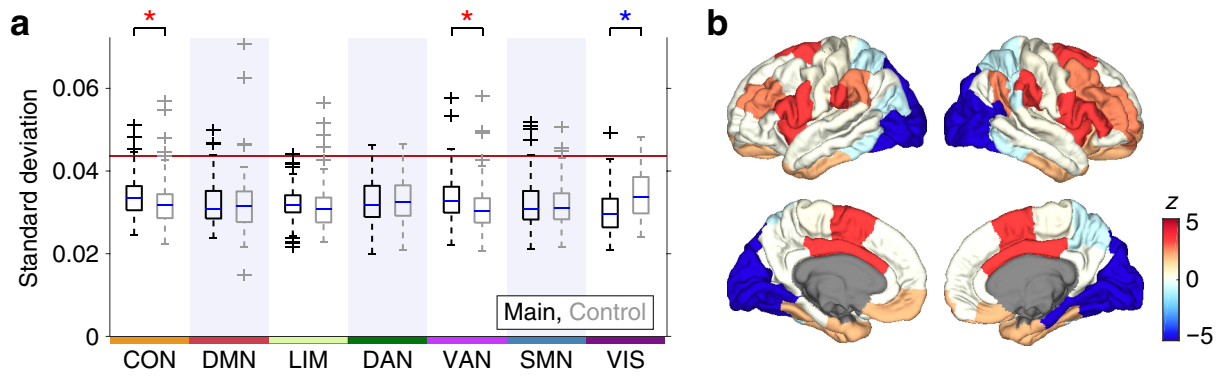

**Supplementary Fig. 8** The SD of dynamic fluctuations in modularity, obtained from each main–control pair of the RSN-constrained surrogate connectome data. **a** The SD of modularity across time. The median SD computed from empirical rs-fMRI data is shown by a red vertical line. An asterisk indicates significant differences between the SDs ( $p < 0.05$ , FDR corrected across all the 7 comparisons; blue asterisk, Main < Control; red asterisk, Main > Control). The exact  $p$  and  $n$  are shown in Supplementary Table 10. **b** Cortical surface plots of the  $z$ -values of differences between the SDs (Main – Control).



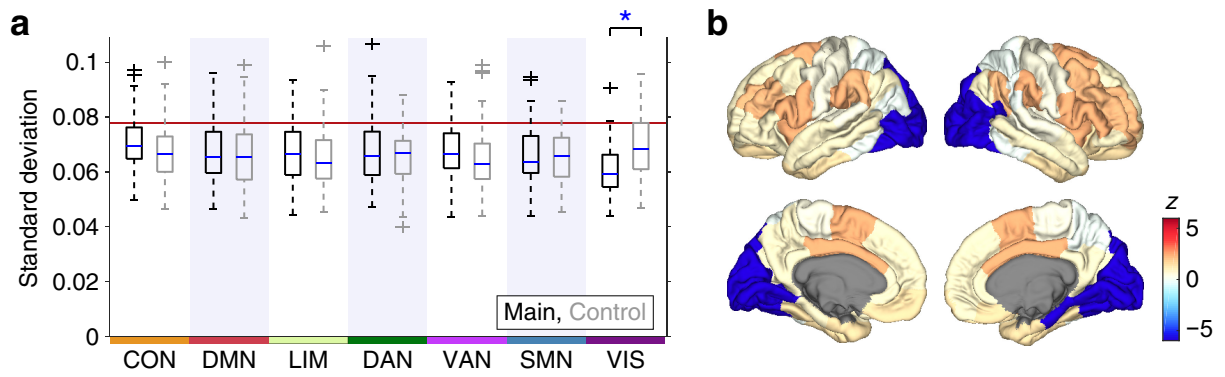

**Supplementary Fig. 9** The SD of dynamic fluctuations in mean PC with a window width of 44 TRs, obtained from each main–control pair of the RSN-constrained surrogate connectome data. **a** The SD of mean PC across time. The median SD computed from empirical rs-fMRI data is shown by a red vertical line. An asterisk indicates significant differences between the SDs ( $p < 0.05$ , FDR corrected across all the 7 comparisons). The exact  $p$  and  $n$  are shown in Supplementary Table 11. **b** Cortical surface plots of the  $z$ -values of differences between the SDs (Main – Control).

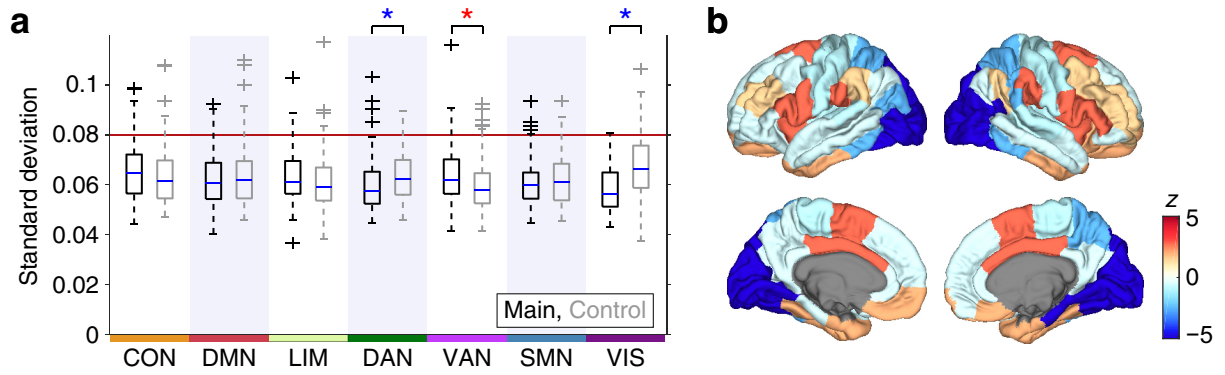

**Supplementary Fig. 10** The SD of dynamic fluctuations in mean PC with a window width of 88 TRs, obtained from each main-control pair of the RSN-constrained surrogate connectome data. **a** The SD of mean PC across time. The median SD computed from empirical rs-fMRI data is shown by a red vertical line. An asterisk indicates significant differences between the SDs ( $p < 0.05$ , FDR corrected across all the 7 comparisons; blue asterisk, Main < Control; red asterisk, Main > Control). The exact  $p$  and  $n$  are shown in Supplementary Table 12. **b** Cortical surface plots of the  $z$ -values of differences between the SDs (Main - Control).

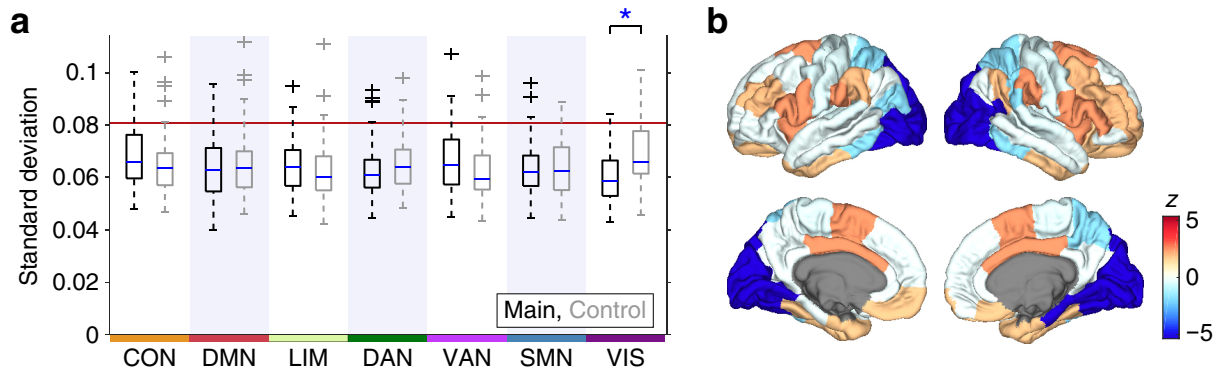

**Supplementary Fig. 11** The SD of dynamic fluctuations in mean PC with a window displacement of 1 TR, obtained from each main-control pair of the RSN-constrained surrogate connectome data. **a** The SD of mean PC across time. The median SD computed from empirical rs-fMRI data is shown by a red vertical line. An asterisk indicates significant differences between the SDs ( $p < 0.05$ , FDR corrected across all the 7 comparisons). The exact  $p$  and  $n$  are shown in Supplementary Table 13. **b** Cortical surface plots of the  $z$ -values of differences between the SDs (Main - Control).

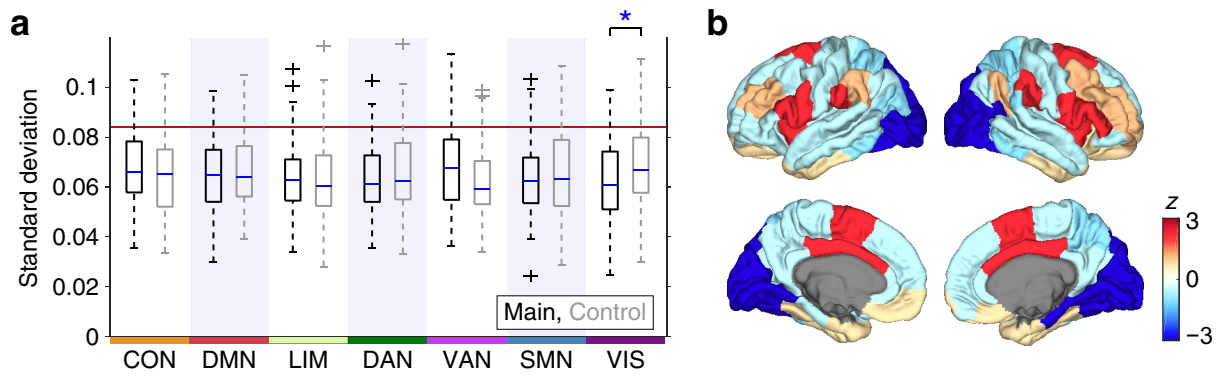

**Supplementary Fig. 12** The SD of dynamic fluctuations in mean PC with a window displacement of 66 TRs, obtained from each main-control pair of the RSN-constrained surrogate connectome data. **a** The SD of mean PC across time. The median SD computed from empirical rs-fMRI data is shown by a red vertical line. An asterisk indicates significant differences between the SDs ( $p < 0.05$ , FDR corrected across all the 7 comparisons). The exact  $p$  and  $n$  are shown in Supplementary Table 14. **b** Cortical surface plots of the  $z$ -values of differences between the SDs (Main - Control).

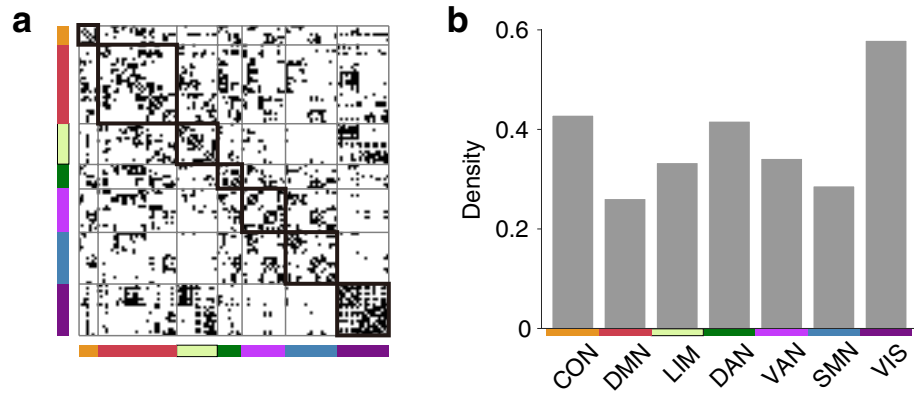

**Supplementary Fig. 13** The density of structural connections. **a** Structural connectivity (binarized) sorted based on the assignment of nodes to the seven RSNs. **b** The density of structural connections within each RSN.

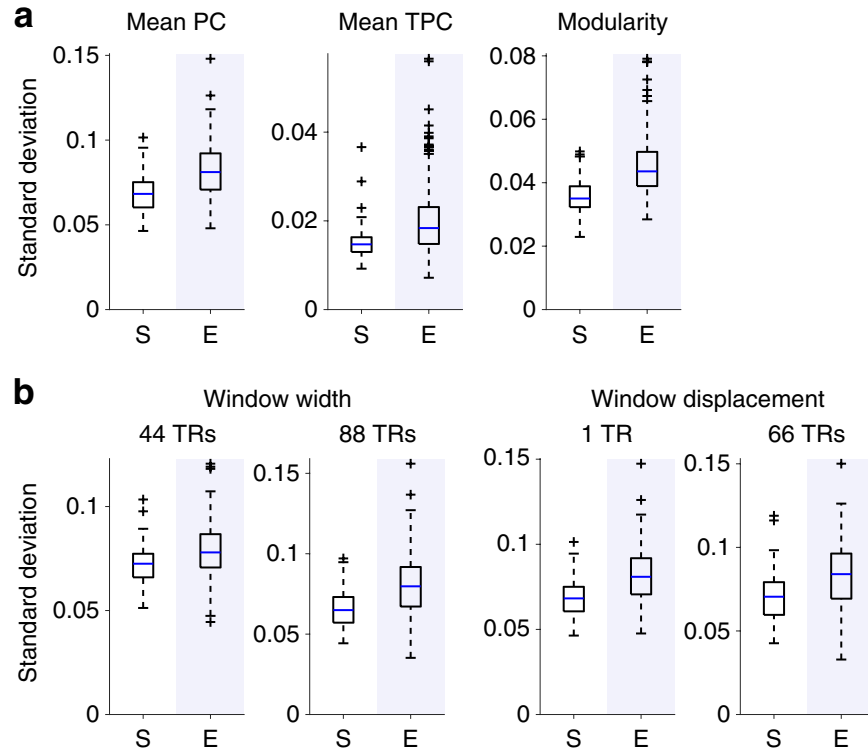

**Supplementary Fig. 14** The SD of dynamic fluctuations in global network measures for segregation and integration. **a** The SD of dynamic fluctuations in mean PC, mean TPC, and modularity (S: simulated data with the actual connectome; E: empirical data). **b** The SD of dynamic fluctuations in mean PC with different window parameters. The exact  $p$  and  $n$  are shown in Supplementary Table 15.

## Supplementary Tables

**Supplementary Table 1.** Comparison of the SD of dynamic fluctuations in mean PC among the surrogate and actual connectome data (Mann-Whitney  $U$  test).  $p < 0.05$  (two-sided, FDR corrected) is shown in **bold**.

|                     | ${}^1G - {}^2R$                        | ${}^1T - {}^2R$                        | ${}^1GT - {}^2R$                        | ${}^1T - {}^2G$ | ${}^1GT - {}^2G$                       | ${}^1GT - {}^2T$                       |
|---------------------|----------------------------------------|----------------------------------------|-----------------------------------------|-----------------|----------------------------------------|----------------------------------------|
| $p$                 | <b><math>3.8 \times 10^{-6}</math></b> | <b><math>7.3 \times 10^{-6}</math></b> | <b><math>4.0 \times 10^{-11}</math></b> | 0.83            | <b><math>4.9 \times 10^{-3}</math></b> | <b><math>8.2 \times 10^{-3}</math></b> |
| median <sub>1</sub> | 0.052                                  | 0.051                                  | 0.057                                   | 0.051           | 0.057                                  | 0.057                                  |
| median <sub>2</sub> | 0.045                                  | 0.045                                  | 0.045                                   | 0.052           | 0.052                                  | 0.051                                  |
| $n_1$               | 50                                     | 50                                     | 50                                      | 50              | 50                                     | 50                                     |
| $n_2$               | 50                                     | 50                                     | 50                                      | 50              | 50                                     | 50                                     |
| $U$                 | 1936                                   | 1912                                   | 2234                                    | 1219            | 1669                                   | 1639                                   |
| $z$ -value          | 4.7                                    | 4.6                                    | 6.8                                     | -0.21           | 2.9                                    | 2.7                                    |
| Cliff's delta       | 0.55                                   | 0.53                                   | 0.79                                    | -0.025          | 0.34                                   | 0.31                                   |
| 95% CI of delta     | [0.34, 0.70]                           | [0.32, 0.69]                           | [0.62, 0.88]                            | [-0.24, 0.20]   | [0.11, 0.52]                           | [0.08, 0.50]                           |

|                     | ${}^1\text{Actual} - {}^2R$             | ${}^1\text{Actual} - {}^2G$             | ${}^1\text{Actual} - {}^2T$             | ${}^1\text{Actual} - {}^2GT$           |
|---------------------|-----------------------------------------|-----------------------------------------|-----------------------------------------|----------------------------------------|
| $p$                 | <b><math>7.8 \times 10^{-21}</math></b> | <b><math>1.4 \times 10^{-12}</math></b> | <b><math>1.4 \times 10^{-10}</math></b> | <b><math>3.9 \times 10^{-7}</math></b> |
| median <sub>1</sub> | 0.068                                   | 0.068                                   | 0.068                                   | 0.068                                  |
| median <sub>2</sub> | 0.045                                   | 0.052                                   | 0.051                                   | 0.057                                  |
| $n_1$               | 100                                     | 100                                     | 100                                     | 100                                    |
| $n_2$               | 50                                      | 50                                      | 50                                      | 50                                     |
| $U$                 | 4909                                    | 4333                                    | 4145                                    | 3806                                   |
| $z$ -value          | 9.6                                     | 7.3                                     | 6.6                                     | 5.2                                    |
| Cliff's delta       | 0.96                                    | 0.73                                    | 0.66                                    | 0.52                                   |
| 95% CI of delta     | [0.88, 0.99]                            | [0.58, 0.83]                            | [0.49, 0.77]                            | [0.34, 0.66]                           |

**Supplementary Table 2.** Comparison of the SD of dynamic fluctuations in mean TPC among the surrogate and actual connectome data (Mann-Whitney  $U$  test).  $p < 0.05$  (two-sided, FDR corrected) is shown in **bold**.

|                     | ${}^1G - {}^2R$                         | ${}^1T - {}^2R$                         | ${}^1GT - {}^2R$                        | ${}^1T - {}^2G$      | ${}^1GT - {}^2G$                       | ${}^1GT - {}^2T$                       |
|---------------------|-----------------------------------------|-----------------------------------------|-----------------------------------------|----------------------|----------------------------------------|----------------------------------------|
| $p$                 | <b><math>8.6 \times 10^{-13}</math></b> | <b><math>4.9 \times 10^{-12}</math></b> | <b><math>1.0 \times 10^{-16}</math></b> | 0.86                 | <b><math>1.6 \times 10^{-5}</math></b> | <b><math>7.0 \times 10^{-5}</math></b> |
| median <sub>1</sub> | $6.3 \times 10^{-3}$                    | $7.0 \times 10^{-3}$                    | $9.7 \times 10^{-3}$                    | $7.0 \times 10^{-3}$ | $9.7 \times 10^{-3}$                   | $9.7 \times 10^{-3}$                   |
| median <sub>2</sub> | $2.8 \times 10^{-3}$                    | $2.8 \times 10^{-3}$                    | $2.8 \times 10^{-3}$                    | $6.3 \times 10^{-3}$ | $6.3 \times 10^{-3}$                   | $7.0 \times 10^{-3}$                   |
| $n_1$               | 50                                      | 50                                      | 50                                      | 50                   | 50                                     | 50                                     |
| $n_2$               | 50                                      | 50                                      | 50                                      | 50                   | 50                                     | 50                                     |
| $U$                 | 2298                                    | 2260                                    | 2482                                    | 1276                 | 1883                                   | 1831                                   |
| $z$ -value          | 7.2                                     | 7.0                                     | 8.5                                     | 0.18                 | 4.4                                    | 4.0                                    |
| Cliff's delta       | 0.84                                    | 0.81                                    | 0.99                                    | 0.021                | 0.51                                   | 0.46                                   |
| 95% CI of delta     | [0.68, 0.92]                            | [0.64, 0.90]                            | [0.89, 1.00]                            | [-0.20, 0.24]        | [0.29, 0.67]                           | [0.25, 0.63]                           |

|                     | ${}^1\text{Actual} - {}^2R$             | ${}^1\text{Actual} - {}^2G$             | ${}^1\text{Actual} - {}^2T$             | ${}^1\text{Actual} - {}^2GT$            |
|---------------------|-----------------------------------------|-----------------------------------------|-----------------------------------------|-----------------------------------------|
| $p$                 | <b><math>2.2 \times 10^{-22}</math></b> | <b><math>3.8 \times 10^{-16}</math></b> | <b><math>4.8 \times 10^{-15}</math></b> | <b><math>6.0 \times 10^{-13}</math></b> |
| median <sub>1</sub> | 0.015                                   | 0.015                                   | 0.015                                   | 0.015                                   |
| median <sub>2</sub> | $2.8 \times 10^{-3}$                    | $6.3 \times 10^{-3}$                    | $7.0 \times 10^{-3}$                    | $9.7 \times 10^{-3}$                    |
| $n_1$               | 100                                     | 100                                     | 100                                     | 100                                     |
| $n_2$               | 50                                      | 50                                      | 50                                      | 50                                      |
| $U$                 | 5000                                    | 4580                                    | 4494                                    | 4330                                    |
| $z$ -value          | 10                                      | 8.3                                     | 7.9                                     | 7.3                                     |
| Cliff's delta       | 1.0                                     | 0.83                                    | 0.80                                    | 0.73                                    |
| 95% CI of delta     | [0.94, 1.00]                            | [0.70, 0.91]                            | [0.66, 0.88]                            | [0.58, 0.83]                            |



**Supplementary Table 3.** Comparison of the SD of dynamic fluctuations in modularity among the surrogate and actual connectome data (Mann-Whitney  $U$  test).  $p < 0.05$  (two-sided, FDR corrected) is shown in **bold**.

|                     | ${}^1G - {}^2R$                         | ${}^1T - {}^2R$                        | ${}^1GT - {}^2R$                        | ${}^1T - {}^2G$ | ${}^1GT - {}^2G$ | ${}^1GT - {}^2T$ |
|---------------------|-----------------------------------------|----------------------------------------|-----------------------------------------|-----------------|------------------|------------------|
| $p$                 | <b><math>5.5 \times 10^{-10}</math></b> | <b><math>7.6 \times 10^{-7}</math></b> | <b><math>5.5 \times 10^{-11}</math></b> | 0.17            | 0.39             | 0.060            |
| median <sub>1</sub> | 0.027                                   | 0.026                                  | 0.028                                   | 0.026           | 0.028            | 0.028            |
| median <sub>2</sub> | 0.020                                   | 0.020                                  | 0.020                                   | 0.027           | 0.027            | 0.026            |
| $n_1$               | 50                                      | 50                                     | 50                                      | 50              | 50               | 50               |
| $n_2$               | 50                                      | 50                                     | 50                                      | 50              | 50               | 50               |
| $U$                 | 2162                                    | 1978                                   | 2236                                    | 1040            | 1374             | 1537             |
| $z$ -value          | 6.3                                     | 5.0                                    | 6.8                                     | -1.4            | 0.85             | 2.0              |
| Cliff's delta       | 0.73                                    | 0.58                                   | 0.79                                    | -0.17           | 0.099            | 0.23             |
| 95% CI of delta     | [0.55, 0.84]                            | [0.37, 0.73]                           | [0.62, 0.88]                            | [-0.38, 0.06]   | [-0.13, 0.31]    | [0.00, 0.43]     |

|                     | ${}^1\text{Actual} - {}^2R$             | ${}^1\text{Actual} - {}^2G$             | ${}^1\text{Actual} - {}^2T$             | ${}^1\text{Actual} - {}^2GT$            |
|---------------------|-----------------------------------------|-----------------------------------------|-----------------------------------------|-----------------------------------------|
| $p$                 | <b><math>4.1 \times 10^{-21}</math></b> | <b><math>8.1 \times 10^{-11}</math></b> | <b><math>1.3 \times 10^{-10}</math></b> | <b><math>6.1 \times 10^{-11}</math></b> |
| median <sub>1</sub> | 0.035                                   | 0.035                                   | 0.035                                   | 0.035                                   |
| median <sub>2</sub> | 0.020                                   | 0.027                                   | 0.026                                   | 0.028                                   |
| $n_1$               | 100                                     | 100                                     | 100                                     | 100                                     |
| $n_2$               | 50                                      | 50                                      | 50                                      | 50                                      |
| $U$                 | 4926                                    | 4165                                    | 4138                                    | 4186                                    |
| $z$ -value          | 9.7                                     | 6.6                                     | 6.5                                     | 6.7                                     |
| Cliff's delta       | 0.97                                    | 0.67                                    | 0.66                                    | 0.67                                    |
| 95% CI of delta     | [0.89, 0.99]                            | [0.50, 0.78]                            | [0.49, 0.77]                            | [0.51, 0.79]                            |

**Supplementary Table 4.** Comparison of the SD of dynamic fluctuations in mean PC with a window width of 44 TRs among the surrogate and actual connectome data (Mann-Whitney  $U$  test).  $p < 0.05$  ( $z > 0$ ) and  $p < 0.05$  ( $z < 0$ ) (two-sided, FDR corrected) are shown in **bold** and *bold italic*, respectively.

|                     | ${}^1G - {}^2R$                        | ${}^1T - {}^2R$                        | ${}^1GT - {}^2R$                        | ${}^1T - {}^2G$     | ${}^1GT - {}^2G$ | ${}^1GT - {}^2T$                       |
|---------------------|----------------------------------------|----------------------------------------|-----------------------------------------|---------------------|------------------|----------------------------------------|
| $p$                 | <b><math>4.0 \times 10^{-8}</math></b> | <b><math>2.6 \times 10^{-4}</math></b> | <b><math>6.2 \times 10^{-13}</math></b> | <i><b>0.021</b></i> | <b>0.021</b>     | <b><math>7.5 \times 10^{-6}</math></b> |
| median <sub>1</sub> | 0.054                                  | 0.051                                  | 0.060                                   | 0.051               | 0.060            | 0.060                                  |
| median <sub>2</sub> | 0.045                                  | 0.045                                  | 0.045                                   | 0.054               | 0.054            | 0.051                                  |
| $n_1$               | 50                                     | 50                                     | 50                                      | 50                  | 50               | 50                                     |
| $n_2$               | 50                                     | 50                                     | 50                                      | 50                  | 50               | 50                                     |
| $U$                 | 2060                                   | 1788                                   | 2318                                    | 915                 | 1587             | 1911                                   |
| $z$ -value          | 5.6                                    | 3.7                                    | 7.4                                     | -2.3                | 2.3              | 4.6                                    |
| Cliff's delta       | 0.65                                   | 0.43                                   | 0.85                                    | -0.27               | 0.27             | 0.53                                   |
| 95% CI of delta     | [0.45, 0.78]                           | [0.21, 0.60]                           | [0.70, 0.93]                            | [-0.46, -0.04]      | [0.04, 0.47]     | [0.32, 0.69]                           |

|                     | ${}^1\text{Actual} - {}^2R$             | ${}^1\text{Actual} - {}^2G$             | ${}^1\text{Actual} - {}^2T$             | ${}^1\text{Actual} - {}^2GT$           |
|---------------------|-----------------------------------------|-----------------------------------------|-----------------------------------------|----------------------------------------|
| $p$                 | <b><math>1.1 \times 10^{-21}</math></b> | <b><math>1.0 \times 10^{-12}</math></b> | <b><math>3.0 \times 10^{-16}</math></b> | <b><math>3.0 \times 10^{-9}</math></b> |
| median <sub>1</sub> | 0.073                                   | 0.073                                   | 0.073                                   | 0.073                                  |
| median <sub>2</sub> | 0.045                                   | 0.054                                   | 0.051                                   | 0.060                                  |
| $n_1$               | 100                                     | 100                                     | 100                                     | 100                                    |
| $n_2$               | 50                                      | 50                                      | 50                                      | 50                                     |
| $U$                 | 4959                                    | 4320                                    | 4599                                    | 4017                                   |
| $z$ -value          | 9.8                                     | 7.3                                     | 8.4                                     | 6.0                                    |
| Cliff's delta       | 0.98                                    | 0.73                                    | 0.84                                    | 0.61                                   |
| 95% CI of delta     | [0.91, 1.00]                            | [0.57, 0.83]                            | [0.71, 0.91]                            | [0.43, 0.73]                           |

**Supplementary Table 5.** Comparison of the SD of dynamic fluctuations in mean PC with a window width of 88 TRs among the surrogate and actual connectome data (Mann-Whitney  $U$  test).  $p < 0.05$  (two-sided, FDR corrected) is shown in **bold**.

|                     | ${}^1G - {}^2R$                        | ${}^1T - {}^2R$                        | ${}^1GT - {}^2R$                       | ${}^1T - {}^2G$ | ${}^1GT - {}^2G$ | ${}^1GT - {}^2T$ |
|---------------------|----------------------------------------|----------------------------------------|----------------------------------------|-----------------|------------------|------------------|
| $p$                 | <b><math>6.3 \times 10^{-4}</math></b> | <b><math>5.3 \times 10^{-5}</math></b> | <b><math>2.2 \times 10^{-8}</math></b> | 0.51            | <b>0.022</b>     | 0.17             |
| median <sub>1</sub> | 0.052                                  | 0.053                                  | 0.057                                  | 0.053           | 0.057            | 0.057            |
| median <sub>2</sub> | 0.046                                  | 0.046                                  | 0.046                                  | 0.052           | 0.052            | 0.053            |
| $n_1$               | 50                                     | 50                                     | 50                                     | 50              | 50               | 50               |
| $n_2$               | 50                                     | 50                                     | 50                                     | 50              | 50               | 50               |
| $U$                 | 1760                                   | 1860                                   | 2092                                   | 1347            | 1595             | 1458             |
| $z$ -value          | 3.5                                    | 4.2                                    | 5.8                                    | 0.67            | 2.4              | 1.4              |
| Cliff's delta       | 0.41                                   | 0.49                                   | 0.67                                   | 0.078           | 0.28             | 0.17             |
| 95% CI of delta     | [0.19, 0.59]                           | [0.27, 0.65]                           | [0.48, 0.80]                           | [-0.15, 0.29]   | [0.05, 0.47]     | [-0.06, 0.37]    |

|                     | ${}^1\text{Actual} - {}^2R$             | ${}^1\text{Actual} - {}^2G$            | ${}^1\text{Actual} - {}^2T$            | ${}^1\text{Actual} - {}^2GT$           |
|---------------------|-----------------------------------------|----------------------------------------|----------------------------------------|----------------------------------------|
| $p$                 | <b><math>3.4 \times 10^{-18}</math></b> | <b><math>4.5 \times 10^{-9}</math></b> | <b><math>7.4 \times 10^{-7}</math></b> | <b><math>1.0 \times 10^{-4}</math></b> |
| median <sub>1</sub> | 0.065                                   | 0.065                                  | 0.065                                  | 0.065                                  |
| median <sub>2</sub> | 0.046                                   | 0.052                                  | 0.053                                  | 0.057                                  |
| $n_1$               | 100                                     | 100                                    | 100                                    | 100                                    |
| $n_2$               | 50                                      | 50                                     | 50                                     | 50                                     |
| $U$                 | 4747                                    | 4037                                   | 3786                                   | 3505                                   |
| $z$ -value          | 9.0                                     | 6.1                                    | 5.1                                    | 4.0                                    |
| Cliff's delta       | 0.90                                    | 0.61                                   | 0.51                                   | 0.40                                   |
| 95% CI of delta     | [0.79, 0.95]                            | [0.44, 0.74]                           | [0.33, 0.66]                           | [0.21, 0.56]                           |

**Supplementary Table 6.** Comparison of the SD of dynamic fluctuations in mean PC with a window displacement of 1 TR among the surrogate and actual connectome data (Mann-Whitney  $U$  test).  $p < 0.05$  (two-sided, FDR corrected) is shown in **bold**.

|                     | ${}^1G - {}^2R$                        | ${}^1T - {}^2R$                        | ${}^1GT - {}^2R$                        | ${}^1T - {}^2G$ | ${}^1GT - {}^2G$                       | ${}^1GT - {}^2T$                       |
|---------------------|----------------------------------------|----------------------------------------|-----------------------------------------|-----------------|----------------------------------------|----------------------------------------|
| $p$                 | <b><math>2.9 \times 10^{-6}</math></b> | <b><math>6.8 \times 10^{-6}</math></b> | <b><math>1.6 \times 10^{-11}</math></b> | 0.81            | <b><math>4.3 \times 10^{-3}</math></b> | <b><math>7.6 \times 10^{-3}</math></b> |
| median <sub>1</sub> | 0.052                                  | 0.050                                  | 0.057                                   | 0.050           | 0.057                                  | 0.057                                  |
| median <sub>2</sub> | 0.045                                  | 0.045                                  | 0.045                                   | 0.052           | 0.052                                  | 0.050                                  |
| $n_1$               | 50                                     | 50                                     | 50                                      | 50              | 50                                     | 50                                     |
| $n_2$               | 50                                     | 50                                     | 50                                      | 50              | 50                                     | 50                                     |
| $U$                 | 1944                                   | 1914                                   | 2253                                    | 1215            | 1675                                   | 1643                                   |
| $z$ -value          | 4.8                                    | 4.6                                    | 6.9                                     | -0.24           | 2.9                                    | 2.7                                    |
| Cliff's delta       | 0.56                                   | 0.53                                   | 0.80                                    | -0.028          | 0.34                                   | 0.31                                   |
| 95% CI of delta     | [0.34, 0.71]                           | [0.32, 0.69]                           | [0.63, 0.89]                            | [-0.25, 0.19]   | [0.11, 0.53]                           | [0.09, 0.51]                           |

|                     | ${}^1\text{Actual} - {}^2R$             | ${}^1\text{Actual} - {}^2G$             | ${}^1\text{Actual} - {}^2T$             | ${}^1\text{Actual} - {}^2GT$           |
|---------------------|-----------------------------------------|-----------------------------------------|-----------------------------------------|----------------------------------------|
| $p$                 | <b><math>8.8 \times 10^{-21}</math></b> | <b><math>1.1 \times 10^{-12}</math></b> | <b><math>1.8 \times 10^{-10}</math></b> | <b><math>7.7 \times 10^{-7}</math></b> |
| median <sub>1</sub> | 0.068                                   | 0.068                                   | 0.068                                   | 0.068                                  |
| median <sub>2</sub> | 0.045                                   | 0.052                                   | 0.050                                   | 0.057                                  |
| $n_1$               | 100                                     | 100                                     | 100                                     | 100                                    |
| $n_2$               | 50                                      | 50                                      | 50                                      | 50                                     |
| $U$                 | 4906                                    | 4342                                    | 4134                                    | 3774                                   |
| $z$ -value          | 9.6                                     | 7.3                                     | 6.5                                     | 5.1                                    |
| Cliff's delta       | 0.96                                    | 0.74                                    | 0.65                                    | 0.51                                   |
| 95% CI of delta     | [0.88, 0.99]                            | [0.58, 0.84]                            | [0.49, 0.77]                            | [0.33, 0.65]                           |

**Supplementary Table 7.** Comparison of the SD of dynamic fluctuations in mean PC with a window displacement of 66 TRs among the surrogate and actual connectome data (Mann-Whitney  $U$  test).  $p < 0.05$  (two-sided, FDR corrected) is shown in **bold**.

|                     | ${}^1G - {}^2R$ | ${}^1T - {}^2R$                        | ${}^1GT - {}^2R$                       | ${}^1T - {}^2G$ | ${}^1GT - {}^2G$                       | ${}^1GT - {}^2T$ |
|---------------------|-----------------|----------------------------------------|----------------------------------------|-----------------|----------------------------------------|------------------|
| $p$                 | <b>0.014</b>    | <b><math>4.6 \times 10^{-3}</math></b> | <b><math>4.2 \times 10^{-8}</math></b> | 0.62            | <b><math>2.8 \times 10^{-3}</math></b> | <b>0.018</b>     |
| median <sub>1</sub> | 0.050           | 0.050                                  | 0.059                                  | 0.050           | 0.059                                  | 0.059            |
| median <sub>2</sub> | 0.044           | 0.044                                  | 0.044                                  | 0.050           | 0.050                                  | 0.050            |
| $n_1$               | 50              | 50                                     | 50                                     | 50              | 50                                     | 50               |
| $n_2$               | 50              | 50                                     | 50                                     | 50              | 50                                     | 50               |
| $U$                 | 1619            | 1678                                   | 2069                                   | 1323            | 1706                                   | 1598             |
| $z$ -value          | 2.5             | 2.9                                    | 5.6                                    | 0.50            | 3.1                                    | 2.4              |
| Cliff's delta       | 0.3             | 0.34                                   | 0.66                                   | 0.058           | 0.36                                   | 0.28             |
| 95% CI of delta     | [0.07, 0.49]    | [0.12, 0.53]                           | [0.46, 0.79]                           | [-0.17, 0.28]   | [0.14, 0.55]                           | [0.05, 0.47]     |

|                     | ${}^1\text{Actual} - {}^2R$             | ${}^1\text{Actual} - {}^2G$             | ${}^1\text{Actual} - {}^2T$            | ${}^1\text{Actual} - {}^2GT$           |
|---------------------|-----------------------------------------|-----------------------------------------|----------------------------------------|----------------------------------------|
| $p$                 | <b><math>4.7 \times 10^{-17}</math></b> | <b><math>1.3 \times 10^{-10}</math></b> | <b><math>1.1 \times 10^{-8}</math></b> | <b><math>2.0 \times 10^{-4}</math></b> |
| median <sub>1</sub> | 0.070                                   | 0.070                                   | 0.070                                  | 0.070                                  |
| median <sub>2</sub> | 0.044                                   | 0.050                                   | 0.050                                  | 0.059                                  |
| $n_1$               | 100                                     | 100                                     | 100                                    | 100                                    |
| $n_2$               | 50                                      | 50                                      | 50                                     | 50                                     |
| $U$                 | 4673                                    | 4174                                    | 3983                                   | 3475                                   |
| $z$ -value          | 8.7                                     | 6.7                                     | 5.9                                    | 3.9                                    |
| Cliff's delta       | 0.87                                    | 0.67                                    | 0.59                                   | 0.39                                   |
| 95% CI of delta     | [0.75, 0.93]                            | [0.50, 0.78]                            | [0.42, 0.72]                           | [0.20, 0.55]                           |

**Supplementary Table 8.** Comparison of the SD of dynamic fluctuations in mean PC between the main and control RSN-constrained surrogate connectome data (Mann-Whitney  $U$  test).  $p < 0.05$  ( $z > 0$ ) and  $p < 0.05$  ( $z < 0$ ) (two-sided, FDR corrected) are shown in **bold** and **bold italic**, respectively.

|                                            | CON                                           | DMN                                           | LIM                                           | DAN            | VAN                                           | SMN                                           | VIS                                           |
|--------------------------------------------|-----------------------------------------------|-----------------------------------------------|-----------------------------------------------|----------------|-----------------------------------------------|-----------------------------------------------|-----------------------------------------------|
| <sup>1</sup> Main – <sup>2</sup> Control   |                                               |                                               |                                               |                |                                               |                                               |                                               |
| $p$                                        | 0.091                                         | 0.76                                          | 0.17                                          | 0.16           | 0.057                                         | 0.69                                          | <b><i><math>4.0 \times 10^{-7}</math></i></b> |
| median <sub>1</sub>                        | 0.066                                         | 0.063                                         | 0.064                                         | 0.061          | 0.065                                         | 0.061                                         | 0.059                                         |
| median <sub>2</sub>                        | 0.063                                         | 0.063                                         | 0.060                                         | 0.064          | 0.060                                         | 0.062                                         | 0.066                                         |
| $n_1$                                      | 100                                           | 100                                           | 100                                           | 100            | 100                                           | 100                                           | 100                                           |
| $n_2$                                      | 100                                           | 100                                           | 100                                           | 100            | 100                                           | 100                                           | 100                                           |
| $U$                                        | 5845                                          | 4873                                          | 5640                                          | 4308           | 5985                                          | 4780                                          | 2779                                          |
| $z$ -value                                 | 2.1                                           | -0.31                                         | 1.6                                           | -1.7           | 2.4                                           | -0.54                                         | -5.4                                          |
| Cliff's delta                              | 0.17                                          | -0.025                                        | 0.13                                          | -0.14          | 0.2                                           | -0.044                                        | -0.44                                         |
| 95% CI of delta                            | [0.01, 0.32]                                  | [-0.18, 0.13]                                 | [-0.03, 0.28]                                 | [-0.29, 0.02]  | [0.04, 0.35]                                  | [-0.20, 0.12]                                 | [-0.57, -0.29]                                |
| <sup>1</sup> Main – <sup>2</sup> GT        |                                               |                                               |                                               |                |                                               |                                               |                                               |
| $p$                                        | <b><i><math>1.9 \times 10^{-5}</math></i></b> | <b>0.012</b>                                  | <b><i><math>1.3 \times 10^{-3}</math></i></b> | <b>0.018</b>   | <b><i><math>7.7 \times 10^{-4}</math></i></b> | <b>0.012</b>                                  | 0.36                                          |
| median <sub>1</sub>                        | 0.066                                         | 0.063                                         | 0.064                                         | 0.061          | 0.065                                         | 0.061                                         | 0.059                                         |
| median <sub>2</sub>                        | 0.057                                         | 0.057                                         | 0.057                                         | 0.057          | 0.057                                         | 0.057                                         | 0.057                                         |
| $n_1$                                      | 100                                           | 100                                           | 100                                           | 100            | 100                                           | 100                                           | 100                                           |
| $n_2$                                      | 50                                            | 50                                            | 50                                            | 50             | 50                                            | 50                                            | 50                                            |
| $U$                                        | 3676                                          | 3158                                          | 3368                                          | 3109           | 3427                                          | 3182                                          | 2728                                          |
| $z$ -value                                 | 4.7                                           | 2.6                                           | 3.5                                           | 2.4            | 3.7                                           | 2.7                                           | 0.91                                          |
| Cliff's delta                              | 0.47                                          | 0.26                                          | 0.35                                          | 0.24           | 0.37                                          | 0.27                                          | 0.091                                         |
| 95% CI of delta                            | [0.28, 0.62]                                  | [0.07, 0.44]                                  | [0.15, 0.51]                                  | [0.05, 0.42]   | [0.18, 0.53]                                  | [0.08, 0.44]                                  | [-0.10, 0.28]                                 |
| <sup>1</sup> Control – <sup>2</sup> Actual |                                               |                                               |                                               |                |                                               |                                               |                                               |
| $p$                                        | <b><i><math>5.0 \times 10^{-3}</math></i></b> | <b><i><math>5.0 \times 10^{-3}</math></i></b> | <b><i><math>1.4 \times 10^{-4}</math></i></b> | <b>0.011</b>   | <b><i><math>5.3 \times 10^{-5}</math></i></b> | <b><i><math>5.0 \times 10^{-3}</math></i></b> | 0.92                                          |
| median <sub>1</sub>                        | 0.063                                         | 0.063                                         | 0.060                                         | 0.064          | 0.060                                         | 0.062                                         | 0.066                                         |
| median <sub>2</sub>                        | 0.068                                         | 0.068                                         | 0.068                                         | 0.068          | 0.068                                         | 0.068                                         | 0.068                                         |
| $n_1$                                      | 100                                           | 100                                           | 100                                           | 100            | 100                                           | 100                                           | 100                                           |
| $n_2$                                      | 100                                           | 100                                           | 100                                           | 100            | 100                                           | 100                                           | 100                                           |
| $U$                                        | 3803                                          | 3807                                          | 3316                                          | 3941           | 3167                                          | 3753                                          | 5043                                          |
| $z$ -value                                 | -2.9                                          | -2.9                                          | -4.1                                          | -2.6           | -4.5                                          | -3.0                                          | 0.10                                          |
| Cliff's delta                              | -0.24                                         | -0.24                                         | -0.34                                         | -0.21          | -0.37                                         | -0.25                                         | $8.6 \times 10^{-3}$                          |
| 95% CI of delta                            | [-0.39, -0.08]                                | [-0.38, -0.08]                                | [-0.47, -0.18]                                | [-0.36, -0.05] | [-0.50, -0.21]                                | [-0.39, -0.09]                                | [-0.15, 0.17]                                 |

**Supplementary Table 9.** Comparison of the SD of dynamic fluctuations in mean TPC between the main and control RSN-constrained surrogate connectome data (Mann-Whitney  $U$  test).  $p < 0.05$  ( $z > 0$ ) and  $p < 0.05$  ( $z < 0$ ) (two-sided, FDR corrected) are shown in **bold** and *bold italic*, respectively.

|                                            | CON                                     | DMN                                    | LIM                                     | DAN                                    | VAN                                    | SMN                                    | VIS                                     |
|--------------------------------------------|-----------------------------------------|----------------------------------------|-----------------------------------------|----------------------------------------|----------------------------------------|----------------------------------------|-----------------------------------------|
| <sup>1</sup> Main – <sup>2</sup> Control   |                                         |                                        |                                         |                                        |                                        |                                        |                                         |
| $p$                                        | <b><math>4.1 \times 10^{-5}</math></b>  | 0.10                                   | <b><math>2.5 \times 10^{-5}</math></b>  | 0.87                                   | <b><math>1.3 \times 10^{-4}</math></b> | 0.067                                  | <i><math>4.4 \times 10^{-15}</math></i> |
| median <sub>1</sub>                        | 0.015                                   | 0.012                                  | 0.014                                   | 0.013                                  | 0.013                                  | 0.013                                  | $9.9 \times 10^{-3}$                    |
| median <sub>2</sub>                        | 0.013                                   | 0.012                                  | 0.012                                   | 0.013                                  | 0.012                                  | 0.012                                  | 0.014                                   |
| $n_1$                                      | 100                                     | 100                                    | 100                                     | 100                                    | 100                                    | 100                                    | 100                                     |
| $n_2$                                      | 100                                     | 100                                    | 100                                     | 100                                    | 100                                    | 100                                    | 100                                     |
| $U$                                        | 6757                                    | 5703                                   | 6839                                    | 4935                                   | 6619                                   | 5811                                   | 1691                                    |
| $z$ -value                                 | 4.3                                     | 1.7                                    | 4.5                                     | -0.16                                  | 4.0                                    | 2.0                                    | -8.1                                    |
| Cliff's delta                              | 0.35                                    | 0.14                                   | 0.37                                    | -0.013                                 | 0.32                                   | 0.16                                   | -0.66                                   |
| 95% CI of delta                            | [0.19, 0.49]                            | [-0.02, 0.29]                          | [0.21, 0.50]                            | [-0.17, 0.15]                          | [0.17, 0.46]                           | [0.00, 0.31]                           | [-0.76, -0.53]                          |
| <sup>1</sup> Main – <sup>2</sup> GT        |                                         |                                        |                                         |                                        |                                        |                                        |                                         |
| $p$                                        | <b><math>3.1 \times 10^{-12}</math></b> | <b><math>9.0 \times 10^{-7}</math></b> | <b><math>1.6 \times 10^{-10}</math></b> | <b><math>1.2 \times 10^{-7}</math></b> | <b><math>3.7 \times 10^{-9}</math></b> | <b><math>3.7 \times 10^{-9}</math></b> | 0.85                                    |
| median <sub>1</sub>                        | 0.015                                   | 0.012                                  | 0.014                                   | 0.013                                  | 0.013                                  | 0.013                                  | $9.9 \times 10^{-3}$                    |
| median <sub>2</sub>                        | $9.7 \times 10^{-3}$                    | $9.7 \times 10^{-3}$                   | $9.7 \times 10^{-3}$                    | $9.7 \times 10^{-3}$                   | $9.7 \times 10^{-3}$                   | $9.7 \times 10^{-3}$                   | $9.7 \times 10^{-3}$                    |
| $n_1$                                      | 100                                     | 100                                    | 100                                     | 100                                    | 100                                    | 100                                    | 100                                     |
| $n_2$                                      | 50                                      | 50                                     | 50                                      | 50                                     | 50                                     | 50                                     | 50                                      |
| $U$                                        | 4317                                    | 3740                                   | 4152                                    | 3843                                   | 4005                                   | 4003                                   | 2453                                    |
| $z$ -value                                 | 7.2                                     | 4.9                                    | 6.6                                     | 5.4                                    | 6.0                                    | 6.0                                    | -0.19                                   |
| Cliff's delta                              | 0.73                                    | 0.50                                   | 0.66                                    | 0.54                                   | 0.60                                   | 0.60                                   | -0.019                                  |
| 95% CI of delta                            | [0.57, 0.83]                            | [0.31, 0.64]                           | [0.49, 0.78]                            | [0.36, 0.67]                           | [0.43, 0.73]                           | [0.43, 0.73]                           | [-0.21, 0.17]                           |
| <sup>1</sup> Control – <sup>2</sup> Actual |                                         |                                        |                                         |                                        |                                        |                                        |                                         |
| $p$                                        | <b><math>7.8 \times 10^{-5}</math></b>  | <b><math>1.1 \times 10^{-7}</math></b> | <b><math>2.5 \times 10^{-8}</math></b>  | <b><math>2.5 \times 10^{-3}</math></b> | <b><math>1.1 \times 10^{-8}</math></b> | <b><math>6.0 \times 10^{-6}</math></b> | 0.88                                    |
| median <sub>1</sub>                        | 0.013                                   | 0.012                                  | 0.012                                   | 0.013                                  | 0.012                                  | 0.012                                  | 0.014                                   |
| median <sub>2</sub>                        | 0.015                                   | 0.015                                  | 0.015                                   | 0.015                                  | 0.015                                  | 0.015                                  | 0.015                                   |
| $n_1$                                      | 100                                     | 100                                    | 100                                     | 100                                    | 100                                    | 100                                    | 100                                     |
| $n_2$                                      | 100                                     | 100                                    | 100                                     | 100                                    | 100                                    | 100                                    | 100                                     |
| $U$                                        | 3350                                    | 2764                                   | 2632                                    | 3742                                   | 2530                                   | 3099                                   | 4938                                    |
| $z$ -value                                 | -4.0                                    | -5.5                                   | -5.8                                    | -3.1                                   | -6.0                                   | -4.6                                   | -0.15                                   |
| Cliff's delta                              | -0.33                                   | -0.45                                  | -0.47                                   | -0.25                                  | -0.49                                  | -0.38                                  | -0.012                                  |
| 95% CI of delta                            | [-0.47, -0.17]                          | [-0.57, -0.30]                         | [-0.60, -0.32]                          | [-0.40, -0.09]                         | [-0.61, -0.35]                         | [-0.51, -0.22]                         | [-0.17, 0.15]                           |

**Supplementary Table 10.** Comparison of the SD of dynamic fluctuations in modularity between the main and control RSN-constrained surrogate connectome data (Mann-Whitney  $U$  test).  $p < 0.05$  ( $z > 0$ ) and  $p < 0.05$  ( $z < 0$ ) (two-sided, FDR corrected) are shown in **bold** and *bold italic*, respectively.

|                                            | CON                                    | DMN                                    | LIM                                    | DAN                                    | VAN                                    | SMN                                    | VIS                                    |
|--------------------------------------------|----------------------------------------|----------------------------------------|----------------------------------------|----------------------------------------|----------------------------------------|----------------------------------------|----------------------------------------|
| <sup>1</sup> Main – <sup>2</sup> Control   |                                        |                                        |                                        |                                        |                                        |                                        |                                        |
| $p$                                        | <b>0.021</b>                           | 0.83                                   | 0.10                                   | 0.65                                   | <b><math>1.9 \times 10^{-3}</math></b> | 0.81                                   | <b><math>9.6 \times 10^{-7}</math></b> |
| median <sub>1</sub>                        | 0.033                                  | 0.031                                  | 0.032                                  | 0.032                                  | 0.033                                  | 0.031                                  | 0.030                                  |
| median <sub>2</sub>                        | 0.032                                  | 0.031                                  | 0.031                                  | 0.033                                  | 0.030                                  | 0.031                                  | 0.034                                  |
| $n_1$                                      | 100                                    | 100                                    | 100                                    | 100                                    | 100                                    | 100                                    | 100                                    |
| $n_2$                                      | 100                                    | 100                                    | 100                                    | 100                                    | 100                                    | 100                                    | 100                                    |
| $U$                                        | 6070                                   | 5088                                   | 5779                                   | 4702                                   | 6415                                   | 5160                                   | 2843                                   |
| $z$ -value                                 | 2.6                                    | 0.21                                   | 1.9                                    | -0.73                                  | 3.5                                    | 0.39                                   | -5.3                                   |
| Cliff's delta                              | 0.21                                   | 0.018                                  | 0.16                                   | -0.060                                 | 0.28                                   | 0.032                                  | -0.43                                  |
| 95% CI of delta                            | [0.05, 0.36]                           | [-0.14, 0.18]                          | [0.00, 0.31]                           | [-0.22, 0.10]                          | [0.12, 0.43]                           | [-0.13, 0.19]                          | [-0.56, -0.28]                         |
| <sup>1</sup> Main – <sup>2</sup> GT        |                                        |                                        |                                        |                                        |                                        |                                        |                                        |
| $p$                                        | <b><math>4.3 \times 10^{-7}</math></b> | <b><math>1.3 \times 10^{-3}</math></b> | <b><math>1.3 \times 10^{-4}</math></b> | <b><math>1.6 \times 10^{-4}</math></b> | <b><math>6.3 \times 10^{-6}</math></b> | <b><math>1.3 \times 10^{-3}</math></b> | 0.16                                   |
| median <sub>1</sub>                        | 0.033                                  | 0.031                                  | 0.032                                  | 0.032                                  | 0.033                                  | 0.031                                  | 0.030                                  |
| median <sub>2</sub>                        | 0.028                                  | 0.028                                  | 0.028                                  | 0.028                                  | 0.028                                  | 0.028                                  | 0.028                                  |
| $n_1$                                      | 100                                    | 100                                    | 100                                    | 100                                    | 100                                    | 100                                    | 100                                    |
| $n_2$                                      | 50                                     | 50                                     | 50                                     | 50                                     | 50                                     | 50                                     | 50                                     |
| $U$                                        | 3859                                   | 3320                                   | 3513                                   | 3483                                   | 3698                                   | 3330                                   | 2852                                   |
| $z$ -value                                 | 5.4                                    | 3.3                                    | 4.0                                    | 3.9                                    | 4.8                                    | 3.3                                    | 1.4                                    |
| Cliff's delta                              | 0.54                                   | 0.33                                   | 0.41                                   | 0.39                                   | 0.48                                   | 0.33                                   | 0.14                                   |
| 95% CI of delta                            | [0.36, 0.68]                           | [0.13, 0.49]                           | [0.21, 0.56]                           | [0.20, 0.55]                           | [0.29, 0.63]                           | [0.14, 0.50]                           | [-0.06, 0.32]                          |
| <sup>1</sup> Control – <sup>2</sup> Actual |                                        |                                        |                                        |                                        |                                        |                                        |                                        |
| $p$                                        | <b><math>5.0 \times 10^{-6}</math></b> | <b><math>1.6 \times 10^{-6}</math></b> | <b><math>9.2 \times 10^{-8}</math></b> | <b><math>6.9 \times 10^{-4}</math></b> | <b><math>1.1 \times 10^{-9}</math></b> | <b><math>9.2 \times 10^{-8}</math></b> | 0.12                                   |
| median <sub>1</sub>                        | 0.032                                  | 0.031                                  | 0.031                                  | 0.033                                  | 0.030                                  | 0.031                                  | 0.034                                  |
| median <sub>2</sub>                        | 0.035                                  | 0.035                                  | 0.035                                  | 0.035                                  | 0.035                                  | 0.035                                  | 0.035                                  |
| $n_1$                                      | 100                                    | 100                                    | 100                                    | 100                                    | 100                                    | 100                                    | 100                                    |
| $n_2$                                      | 100                                    | 100                                    | 100                                    | 100                                    | 100                                    | 100                                    | 100                                    |
| $U$                                        | 3103                                   | 2992                                   | 2751                                   | 3593                                   | 2379                                   | 2745                                   | 4355                                   |
| $z$ -value                                 | -4.6                                   | -4.9                                   | -5.5                                   | -3.4                                   | -6.4                                   | -5.5                                   | -1.6                                   |
| Cliff's delta                              | -0.38                                  | -0.40                                  | -0.45                                  | -0.28                                  | -0.52                                  | -0.45                                  | -0.13                                  |
| 95% CI of delta                            | [-0.51, -0.22]                         | [-0.53, -0.25]                         | [-0.58, -0.30]                         | [-0.42, -0.12]                         | [-0.64, -0.38]                         | [-0.58, -0.30]                         | [-0.28, 0.03]                          |



**Supplementary Table 11.** Comparison of the SD of dynamic fluctuations in mean PC with a window width of 44 TRs between the main and control RSN-constrained surrogate connectome data (Mann-Whitney  $U$  test).  $p < 0.05$  ( $z > 0$ ) and  $p < 0.05$  ( $z < 0$ ) (two-sided, FDR corrected) are shown in **bold** and *bold italic*, respectively.

|                                            | CON                                           | DMN                                           | LIM                                           | DAN                                           | VAN                                           | SMN                                           | VIS                                           |
|--------------------------------------------|-----------------------------------------------|-----------------------------------------------|-----------------------------------------------|-----------------------------------------------|-----------------------------------------------|-----------------------------------------------|-----------------------------------------------|
| <sup>1</sup> Main – <sup>2</sup> Control   |                                               |                                               |                                               |                                               |                                               |                                               |                                               |
| $p$                                        | 0.059                                         | 0.56                                          | 0.27                                          | 0.92                                          | 0.059                                         | 0.82                                          | <b><i><math>1.6 \times 10^{-8}</math></i></b> |
| median <sub>1</sub>                        | 0.070                                         | 0.066                                         | 0.067                                         | 0.066                                         | 0.067                                         | 0.064                                         | 0.059                                         |
| median <sub>2</sub>                        | 0.067                                         | 0.066                                         | 0.063                                         | 0.067                                         | 0.063                                         | 0.066                                         | 0.068                                         |
| $n_1$                                      | 100                                           | 100                                           | 100                                           | 100                                           | 100                                           | 100                                           | 100                                           |
| $n_2$                                      | 100                                           | 100                                           | 100                                           | 100                                           | 100                                           | 100                                           | 100                                           |
| $U$                                        | 5915                                          | 5346                                          | 5581                                          | 4956                                          | 5952                                          | 5156                                          | 2554                                          |
| $z$ -value                                 | 2.2                                           | 0.84                                          | 1.4                                           | -0.11                                         | 2.3                                           | 0.38                                          | -6.0                                          |
| Cliff's delta                              | 0.18                                          | 0.069                                         | 0.12                                          | $-8.8 \times 10^{-3}$                         | 0.19                                          | 0.031                                         | -0.49                                         |
| 95% CI of delta                            | [0.02, 0.33]                                  | [-0.09, 0.22]                                 | [-0.04, 0.27]                                 | [-0.17, 0.15]                                 | [0.03, 0.34]                                  | [-0.13, 0.19]                                 | [-0.61, -0.34]                                |
| <sup>1</sup> Main – <sup>2</sup> GT        |                                               |                                               |                                               |                                               |                                               |                                               |                                               |
| $p$                                        | <b><i><math>6.1 \times 10^{-7}</math></i></b> | <b><i><math>9.5 \times 10^{-4}</math></i></b> | <b><i><math>9.5 \times 10^{-4}</math></i></b> | <b><i><math>1.2 \times 10^{-3}</math></i></b> | <b><i><math>4.4 \times 10^{-4}</math></i></b> | <b><i><math>1.2 \times 10^{-3}</math></i></b> | 0.99                                          |
| median <sub>1</sub>                        | 0.070                                         | 0.066                                         | 0.067                                         | 0.066                                         | 0.067                                         | 0.064                                         | 0.059                                         |
| median <sub>2</sub>                        | 0.060                                         | 0.060                                         | 0.060                                         | 0.060                                         | 0.060                                         | 0.060                                         | 0.060                                         |
| $n_1$                                      | 100                                           | 100                                           | 100                                           | 100                                           | 100                                           | 100                                           | 100                                           |
| $n_2$                                      | 50                                            | 50                                            | 50                                            | 50                                            | 50                                            | 50                                            | 50                                            |
| $U$                                        | 3843                                          | 3368                                          | 3370                                          | 3322                                          | 3463                                          | 3334                                          | 2504                                          |
| $z$ -value                                 | 5.4                                           | 3.5                                           | 3.5                                           | 3.3                                           | 3.8                                           | 3.3                                           | 0.014                                         |
| Cliff's delta                              | 0.54                                          | 0.35                                          | 0.35                                          | 0.33                                          | 0.39                                          | 0.33                                          | $1.6 \times 10^{-3}$                          |
| 95% CI of delta                            | [0.36, 0.67]                                  | [0.15, 0.51]                                  | [0.15, 0.51]                                  | [0.13, 0.49]                                  | [0.19, 0.54]                                  | [0.14, 0.50]                                  | [-0.19, 0.19]                                 |
| <sup>1</sup> Control – <sup>2</sup> Actual |                                               |                                               |                                               |                                               |                                               |                                               |                                               |
| $p$                                        | <b><i><math>6.5 \times 10^{-4}</math></i></b> | <b><i><math>1.2 \times 10^{-4}</math></i></b> | <b><i><math>1.0 \times 10^{-5}</math></i></b> | <b><i><math>1.3 \times 10^{-4}</math></i></b> | <b><i><math>1.2 \times 10^{-6}</math></i></b> | <b><i><math>4.8 \times 10^{-5}</math></i></b> | 0.15                                          |
| median <sub>1</sub>                        | 0.067                                         | 0.066                                         | 0.063                                         | 0.067                                         | 0.063                                         | 0.066                                         | 0.068                                         |
| median <sub>2</sub>                        | 0.073                                         | 0.073                                         | 0.073                                         | 0.073                                         | 0.073                                         | 0.073                                         | 0.073                                         |
| $n_1$                                      | 100                                           | 100                                           | 100                                           | 100                                           | 100                                           | 100                                           | 100                                           |
| $n_2$                                      | 100                                           | 100                                           | 100                                           | 100                                           | 100                                           | 100                                           | 100                                           |
| $U$                                        | 3587                                          | 3373                                          | 3086                                          | 3401                                          | 2862                                          | 3256                                          | 4414                                          |
| $z$ -value                                 | -3.5                                          | -4.0                                          | -4.7                                          | -3.9                                          | -5.2                                          | -4.3                                          | -1.4                                          |
| Cliff's delta                              | -0.28                                         | -0.33                                         | -0.38                                         | -0.32                                         | -0.43                                         | -0.35                                         | -0.12                                         |
| 95% CI of delta                            | [-0.42, -0.12]                                | [-0.46, -0.17]                                | [-0.52, -0.23]                                | [-0.46, -0.16]                                | [-0.56, -0.27]                                | [-0.49, -0.19]                                | [-0.27, 0.04]                                 |

**Supplementary Table 12.** Comparison of the SD of dynamic fluctuations in mean PC with a window width of 88 TRs between the main and control RSN-constrained surrogate connectome data (Mann-Whitney  $U$  test).  $p < 0.05$  ( $z > 0$ ) and  $p < 0.05$  ( $z < 0$ ) (two-sided, FDR corrected) are shown in **bold** and *bold italic*, respectively.

|                                            | CON                                           | DMN           | LIM                                           | DAN                 | VAN                                           | SMN            | VIS                                           |
|--------------------------------------------|-----------------------------------------------|---------------|-----------------------------------------------|---------------------|-----------------------------------------------|----------------|-----------------------------------------------|
| <sup>1</sup> Main – <sup>2</sup> Control   |                                               |               |                                               |                     |                                               |                |                                               |
| $p$                                        | 0.16                                          | 0.57          | 0.071                                         | <b><i>0.033</i></b> | <b>0.015</b>                                  | 0.48           | <b><i><math>1.4 \times 10^{-6}</math></i></b> |
| median <sub>1</sub>                        | 0.065                                         | 0.061         | 0.061                                         | 0.058               | 0.062                                         | 0.060          | 0.056                                         |
| median <sub>2</sub>                        | 0.062                                         | 0.062         | 0.059                                         | 0.062               | 0.058                                         | 0.061          | 0.066                                         |
| $n_1$                                      | 100                                           | 100           | 100                                           | 100                 | 100                                           | 100            | 100                                           |
| $n_2$                                      | 100                                           | 100           | 100                                           | 100                 | 100                                           | 100            | 100                                           |
| $U$                                        | 5645                                          | 4766          | 5838                                          | 3995                | 6173                                          | 4664           | 2869                                          |
| $z$ -value                                 | 1.6                                           | -0.57         | 2.0                                           | -2.5                | 2.9                                           | -0.82          | -5.2                                          |
| Cliff's delta                              | 0.13                                          | -0.047        | 0.17                                          | -0.2                | 0.23                                          | -0.067         | -0.43                                         |
| 95% CI of delta                            | [-0.03, 0.28]                                 | [-0.20, 0.11] | [0.01, 0.32]                                  | [-0.35, -0.04]      | [0.07, 0.38]                                  | [-0.22, 0.09]  | [-0.55, -0.27]                                |
| <sup>1</sup> Main – <sup>2</sup> GT        |                                               |               |                                               |                     |                                               |                |                                               |
| $p$                                        | <b><i><math>1.3 \times 10^{-3}</math></i></b> | <b>0.0498</b> | <b><i><math>3.2 \times 10^{-3}</math></i></b> | 0.34                | <b><i><math>3.2 \times 10^{-3}</math></i></b> | 0.086          | 0.75                                          |
| median <sub>1</sub>                        | 0.065                                         | 0.061         | 0.061                                         | 0.058               | 0.062                                         | 0.060          | 0.056                                         |
| median <sub>2</sub>                        | 0.057                                         | 0.057         | 0.057                                         | 0.057               | 0.057                                         | 0.057          | 0.057                                         |
| $n_1$                                      | 100                                           | 100           | 100                                           | 100                 | 100                                           | 100            | 100                                           |
| $n_2$                                      | 50                                            | 50            | 50                                            | 50                  | 50                                            | 50             | 50                                            |
| $U$                                        | 3438                                          | 3050          | 3325                                          | 2765                | 3303                                          | 2970           | 2581                                          |
| $z$ -value                                 | 3.7                                           | 2.2           | 3.3                                           | 1.1                 | 3.2                                           | 1.9            | 0.32                                          |
| Cliff's delta                              | 0.38                                          | 0.22          | 0.33                                          | 0.11                | 0.32                                          | 0.19           | 0.032                                         |
| 95% CI of delta                            | [0.18, 0.54]                                  | [0.02, 0.40]  | [0.14, 0.50]                                  | [-0.09, 0.29]       | [0.13, 0.49]                                  | [-0.01, 0.37]  | [-0.16, 0.22]                                 |
| <sup>1</sup> Control – <sup>2</sup> Actual |                                               |               |                                               |                     |                                               |                |                                               |
| $p$                                        | 0.11                                          | 0.11          | <b><i><math>6.3 \times 10^{-3}</math></i></b> | 0.11                | <b><i><math>4.6 \times 10^{-4}</math></i></b> | 0.055          | 0.34                                          |
| median <sub>1</sub>                        | 0.062                                         | 0.062         | 0.059                                         | 0.062               | 0.058                                         | 0.061          | 0.066                                         |
| median <sub>2</sub>                        | 0.065                                         | 0.065         | 0.065                                         | 0.065               | 0.065                                         | 0.065          | 0.065                                         |
| $n_1$                                      | 100                                           | 100           | 100                                           | 100                 | 100                                           | 100            | 100                                           |
| $n_2$                                      | 100                                           | 100           | 100                                           | 100                 | 100                                           | 100            | 100                                           |
| $U$                                        | 4257                                          | 4311          | 3722                                          | 4313                | 3365                                          | 4074           | 5392                                          |
| $z$ -value                                 | -1.8                                          | -1.7          | -3.1                                          | -1.7                | -4.0                                          | -2.3           | 0.96                                          |
| Cliff's delta                              | -0.15                                         | -0.14         | -0.26                                         | -0.14               | -0.33                                         | -0.19          | 0.078                                         |
| 95% CI of delta                            | [-0.30, 0.01]                                 | [-0.29, 0.02] | [-0.40, -0.10]                                | [-0.29, 0.02]       | [-0.47, -0.17]                                | [-0.33, -0.02] | [-0.08, 0.23]                                 |

**Supplementary Table 13.** Comparison of the SD of dynamic fluctuations in mean PC with a window displacement of 1 TR between the main and control RSN-constrained surrogate connectome data (Mann-Whitney  $U$  test).  $p < 0.05$  ( $z > 0$ ) and  $p < 0.05$  ( $z < 0$ ) (two-sided, FDR corrected) are shown in **bold** and *bold italic*, respectively.

|                                            | CON                                           | DMN                                           | LIM                                           | DAN            | VAN                                           | SMN                                           | VIS                                           |
|--------------------------------------------|-----------------------------------------------|-----------------------------------------------|-----------------------------------------------|----------------|-----------------------------------------------|-----------------------------------------------|-----------------------------------------------|
| <sup>1</sup> Main – <sup>2</sup> Control   |                                               |                                               |                                               |                |                                               |                                               |                                               |
| $p$                                        | 0.11                                          | 0.76                                          | 0.11                                          | 0.11           | 0.064                                         | 0.76                                          | <b><i><math>6.1 \times 10^{-7}</math></i></b> |
| median <sub>1</sub>                        | 0.066                                         | 0.063                                         | 0.064                                         | 0.061          | 0.065                                         | 0.062                                         | 0.059                                         |
| median <sub>2</sub>                        | 0.064                                         | 0.064                                         | 0.060                                         | 0.064          | 0.060                                         | 0.062                                         | 0.066                                         |
| $n_1$                                      | 100                                           | 100                                           | 100                                           | 100            | 100                                           | 100                                           | 100                                           |
| $n_2$                                      | 100                                           | 100                                           | 100                                           | 100            | 100                                           | 100                                           | 100                                           |
| $U$                                        | 5818                                          | 4872                                          | 5713                                          | 4276           | 5966                                          | 4837                                          | 2809                                          |
| $z$ -value                                 | 2.0                                           | -0.31                                         | 1.7                                           | -1.8           | 2.4                                           | -0.4                                          | -5.4                                          |
| Cliff's delta                              | 0.16                                          | -0.026                                        | 0.14                                          | -0.14          | 0.19                                          | -0.033                                        | -0.44                                         |
| 95% CI of delta                            | [0.00, 0.31]                                  | [-0.18, 0.13]                                 | [-0.02, 0.29]                                 | [-0.30, 0.02]  | [0.03, 0.34]                                  | [-0.19, 0.13]                                 | [-0.57, -0.29]                                |
| <sup>1</sup> Main – <sup>2</sup> GT        |                                               |                                               |                                               |                |                                               |                                               |                                               |
| $p$                                        | <b><i><math>2.8 \times 10^{-5}</math></i></b> | <b>0.013</b>                                  | <b><i><math>1.4 \times 10^{-3}</math></i></b> | <b>0.025</b>   | <b><i><math>1.1 \times 10^{-3}</math></i></b> | <b>0.012</b>                                  | 0.35                                          |
| median <sub>1</sub>                        | 0.066                                         | 0.063                                         | 0.064                                         | 0.061          | 0.065                                         | 0.062                                         | 0.059                                         |
| median <sub>2</sub>                        | 0.057                                         | 0.057                                         | 0.057                                         | 0.057          | 0.057                                         | 0.057                                         | 0.057                                         |
| $n_1$                                      | 100                                           | 100                                           | 100                                           | 100            | 100                                           | 100                                           | 100                                           |
| $n_2$                                      | 50                                            | 50                                            | 50                                            | 50             | 50                                            | 50                                            | 50                                            |
| $U$                                        | 3657                                          | 3152                                          | 3362                                          | 3078           | 3402                                          | 3181                                          | 2734                                          |
| $z$ -value                                 | 4.6                                           | 2.6                                           | 3.4                                           | 2.3            | 3.6                                           | 2.7                                           | 0.93                                          |
| Cliff's delta                              | 0.46                                          | 0.26                                          | 0.34                                          | 0.23           | 0.36                                          | 0.27                                          | 0.094                                         |
| 95% CI of delta                            | [0.28, 0.61]                                  | [0.06, 0.43]                                  | [0.15, 0.51]                                  | [0.03, 0.41]   | [0.17, 0.52]                                  | [0.08, 0.44]                                  | [-0.10, 0.28]                                 |
| <sup>1</sup> Control – <sup>2</sup> Actual |                                               |                                               |                                               |                |                                               |                                               |                                               |
| $p$                                        | <b><i><math>7.2 \times 10^{-3}</math></i></b> | <b><i><math>7.2 \times 10^{-3}</math></i></b> | <b><i><math>1.9 \times 10^{-4}</math></i></b> | <b>0.013</b>   | <b><i><math>1.0 \times 10^{-4}</math></i></b> | <b><i><math>6.1 \times 10^{-3}</math></i></b> | 0.85                                          |
| median <sub>1</sub>                        | 0.064                                         | 0.064                                         | 0.060                                         | 0.064          | 0.060                                         | 0.062                                         | 0.066                                         |
| median <sub>2</sub>                        | 0.068                                         | 0.068                                         | 0.068                                         | 0.068          | 0.068                                         | 0.068                                         | 0.068                                         |
| $n_1$                                      | 100                                           | 100                                           | 100                                           | 100            | 100                                           | 100                                           | 100                                           |
| $n_2$                                      | 100                                           | 100                                           | 100                                           | 100            | 100                                           | 100                                           | 100                                           |
| $U$                                        | 3854                                          | 3847                                          | 3349                                          | 3964           | 3226                                          | 3768                                          | 5079                                          |
| $z$ -value                                 | -2.8                                          | -2.8                                          | -4.0                                          | -2.5           | -4.3                                          | -3.0                                          | 0.19                                          |
| Cliff's delta                              | -0.23                                         | -0.23                                         | -0.33                                         | -0.21          | -0.35                                         | -0.25                                         | 0.016                                         |
| 95% CI of delta                            | [-0.38, -0.07]                                | [-0.38, -0.07]                                | [-0.47, -0.17]                                | [-0.36, -0.05] | [-0.49, -0.20]                                | [-0.39, -0.09]                                | [-0.14, 0.17]                                 |

**Supplementary Table 14.** Comparison of the SD of dynamic fluctuations in mean PC with a window displacement of 66 TRs between the main and control RSN-constrained surrogate connectome data (Mann-Whitney  $U$  test).  $p < 0.05$  ( $z > 0$ ) and  $p < 0.05$  ( $z < 0$ ) (two-sided, FDR corrected) are shown in **bold** and *bold italic*, respectively.

|                                            | CON                 | DMN           | LIM                                 | DAN                 | VAN                                 | SMN                 | VIS                 |
|--------------------------------------------|---------------------|---------------|-------------------------------------|---------------------|-------------------------------------|---------------------|---------------------|
| <sup>1</sup> Main – <sup>2</sup> Control   |                     |               |                                     |                     |                                     |                     |                     |
| $p$                                        | 0.50                | 0.58          | 0.58                                | 0.50                | 0.070                               | 0.58                | <b><i>0.012</i></b> |
| median <sub>1</sub>                        | 0.066               | 0.065         | 0.063                               | 0.061               | 0.068                               | 0.062               | 0.061               |
| median <sub>2</sub>                        | 0.065               | 0.064         | 0.060                               | 0.063               | 0.059                               | 0.063               | 0.067               |
| $n_1$                                      | 100                 | 100           | 100                                 | 100                 | 100                                 | 100                 | 100                 |
| $n_2$                                      | 100                 | 100           | 100                                 | 100                 | 100                                 | 100                 | 100                 |
| $U$                                        | 5454                | 4769          | 5307                                | 4563                | 5953                                | 4776                | 3716                |
| $z$ -value                                 | 1.1                 | -0.56         | 0.75                                | -1.1                | 2.3                                 | -0.55               | -3.1                |
| Cliff's delta                              | 0.091               | -0.046        | 0.061                               | -0.087              | 0.19                                | -0.045              | -0.26               |
| 95% CI of delta                            | [-0.07, 0.25]       | [-0.20, 0.11] | [-0.10, 0.22]                       | [-0.24, 0.07]       | [0.03, 0.34]                        | [-0.20, 0.11]       | [-0.40, -0.10]      |
| <sup>1</sup> Main – <sup>2</sup> GT        |                     |               |                                     |                     |                                     |                     |                     |
| $p$                                        | <b>0.025</b>        | 0.17          | 0.22                                | 0.23                | <b>0.045</b>                        | 0.23                | 0.37                |
| median <sub>1</sub>                        | 0.066               | 0.065         | 0.063                               | 0.061               | 0.068                               | 0.062               | 0.061               |
| median <sub>2</sub>                        | 0.059               | 0.059         | 0.059                               | 0.059               | 0.059                               | 0.059               | 0.059               |
| $n_1$                                      | 100                 | 100           | 100                                 | 100                 | 100                                 | 100                 | 100                 |
| $n_2$                                      | 50                  | 50            | 50                                  | 50                  | 50                                  | 50                  | 50                  |
| $U$                                        | 3230                | 2949          | 2886                                | 2824                | 3125                                | 2833                | 2726                |
| $z$ -value                                 | 2.9                 | 1.8           | 1.5                                 | 1.3                 | 2.5                                 | 1.3                 | 0.90                |
| Cliff's delta                              | 0.29                | 0.18          | 0.15                                | 0.13                | 0.25                                | 0.13                | 0.090               |
| 95% CI of delta                            | [0.10, 0.46]        | [-0.02, 0.36] | [-0.04, 0.34]                       | [-0.07, 0.31]       | [0.05, 0.42]                        | [-0.06, 0.32]       | [-0.10, 0.28]       |
| <sup>1</sup> Control – <sup>2</sup> Actual |                     |               |                                     |                     |                                     |                     |                     |
| $p$                                        | <b><i>0.036</i></b> | 0.059         | <b><i>1.9 × 10<sup>-3</sup></i></b> | <b><i>0.036</i></b> | <b><i>5.3 × 10<sup>-4</sup></i></b> | <b><i>0.036</i></b> | 0.74                |
| median <sub>1</sub>                        | 0.065               | 0.064         | 0.060                               | 0.063               | 0.059                               | 0.063               | 0.067               |
| median <sub>2</sub>                        | 0.070               | 0.070         | 0.070                               | 0.070               | 0.070                               | 0.070               | 0.070               |
| $n_1$                                      | 100                 | 100           | 100                                 | 100                 | 100                                 | 100                 | 100                 |
| $n_2$                                      | 100                 | 100           | 100                                 | 100                 | 100                                 | 100                 | 100                 |
| $U$                                        | 4007                | 4200          | 3586                                | 4086                | 3380                                | 4079                | 4863                |
| $z$ -value                                 | -2.4                | -2.0          | -3.5                                | -2.2                | -4.0                                | -2.2                | -0.33               |
| Cliff's delta                              | -0.20               | -0.16         | -0.28                               | -0.18               | -0.32                               | -0.18               | -0.027              |
| 95% CI of delta                            | [-0.35, -0.04]      | [-0.31, 0.00] | [-0.43, -0.12]                      | [-0.33, -0.02]      | [-0.46, -0.17]                      | [-0.33, -0.02]      | [-0.18, 0.13]       |

**Supplementary Table 15.** Comparison of the SD of dynamic fluctuations in global network measures for segregation and integration between the simulated data (with the actual connectome) and empirical data (Mann-Whitney  $U$  test, two-sided).

|                                                          | Mean PC               | Mean TPC              | Modularity            |  |
|----------------------------------------------------------|-----------------------|-----------------------|-----------------------|--|
| <sup>1</sup> Empirical – <sup>2</sup> Simulated (Actual) |                       |                       |                       |  |
| $p$                                                      | $7.5 \times 10^{-15}$ | $1.7 \times 10^{-11}$ | $7.3 \times 10^{-22}$ |  |
| median <sub>1</sub>                                      | 0.081                 | 0.018                 | 0.044                 |  |
| median <sub>2</sub>                                      | 0.068                 | 0.015                 | 0.035                 |  |
| $n_1$                                                    | 336                   | 336                   | 336                   |  |
| $n_2$                                                    | 100                   | 100                   | 100                   |  |
| $U$                                                      | 25401                 | 24242                 | 27430                 |  |
| $z$ -value                                               | 7.8                   | 6.7                   | 9.6                   |  |
| Cliff's delta                                            | 0.51                  | 0.44                  | 0.63                  |  |
| 95% CI of delta                                          | [0.40, 0.61]          | [0.32, 0.55]          | [0.53, 0.72]          |  |

  

| Mean PC                                                  | Window width         |                       | Window displacement   |                       |
|----------------------------------------------------------|----------------------|-----------------------|-----------------------|-----------------------|
|                                                          | 44 TRs               | 88 TRs                | 1 TR                  | 66 TRs                |
| <sup>1</sup> Empirical – <sup>2</sup> Simulated (Actual) |                      |                       |                       |                       |
| $p$                                                      | $2.5 \times 10^{-7}$ | $4.8 \times 10^{-14}$ | $5.8 \times 10^{-15}$ | $6.9 \times 10^{-10}$ |
| median <sub>1</sub>                                      | 0.078                | 0.080                 | 0.081                 | 0.084                 |
| median <sub>2</sub>                                      | 0.073                | 0.065                 | 0.068                 | 0.070                 |
| $n_1$                                                    | 336                  | 336                   | 336                   | 336                   |
| $n_2$                                                    | 100                  | 100                   | 100                   | 100                   |
| $U$                                                      | 22503                | 25139                 | 25438                 | 23623                 |
| $z$ -value                                               | 5.2                  | 7.5                   | 7.8                   | 6.2                   |
| Cliff's delta                                            | 0.34                 | 0.50                  | 0.51                  | 0.41                  |
| 95% CI of delta                                          | [0.21, 0.45]         | [0.38, 0.60]          | [0.40, 0.61]          | [0.28, 0.51]          |
